# Supplementary material
Source: Royal Society of Chemistry journal article supplement (doi:10.1039/d5tb02620b)
Supplement: d5tb02620b1.pdf [file d5tb02620b1.pdf]

## SUPPORTING INFORMATION

### **Physicochemical Stability and Protein Corona Profiling on the Interaction of Iron Oxide Nanoparticles with Human Tear**

Bhagyasree Paila, Sneha Asok and Anil K. Suresh\*

*Bionanotechnology and Sustainable Laboratory, Department of Biological Sciences, School of Engineering and Applied Sciences, SRM University-AP, Amaravati-522503, India.*

**Corresponding Author:** Email: [anil.s@srmap.edu.in](mailto:anil.s@srmap.edu.in)

**Figure S1**

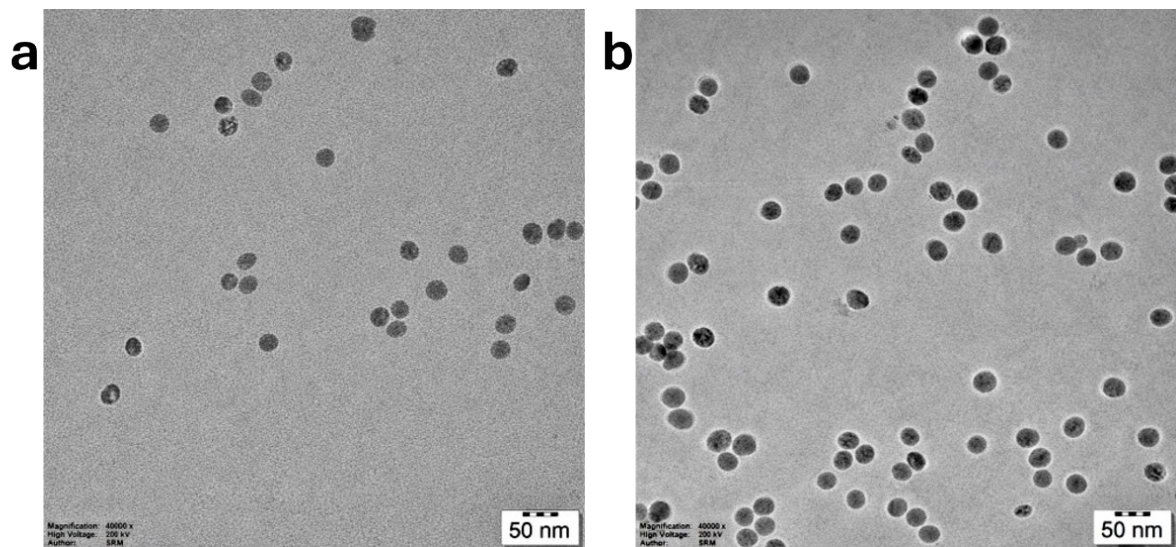

**Fig. S1. Transmission electron microscopy (TEM) images of pristine IONP and protein corona adsorbed iron oxide nanoparticles (IONP@TPC).** (a) Pristine IONPs showing well-dispersed, spherical morphology. (b) IONPs after incubation with tear extract (IONP@TPC), demonstrating the formation of a protein corona, visible as a surrounding lighter halo layer due to negative staining. Scale bar: 50 nm.

**Table S1.** Proteins detected in LC–MS/MS workflow-matched blanks (IONPs without tear extract) processed under identical conditions.

| <b>Uniprot ID</b> | <b>Protein</b>                                    | <b>Normalised Abundance</b> |
|-------------------|---------------------------------------------------|-----------------------------|
| <b>P00761</b>     | Trypsin precursor                                 | 29241.59                    |
| <b>Q15646</b>     | 2'-5'-oligoadenylate synthetase like protein      | 15373.93                    |
| <b>P26189</b>     | ADA regulatory protein                            | 12727.3                     |
| <b>P04264</b>     | Keratin_ type II cytoskeletal 1                   | 12670.57                    |
| <b>P13645</b>     | Keratin_ type I cytoskeletal 10                   | 11809.91                    |
| <b>P35527</b>     | Keratin_ type I cytoskeletal 9                    | 10239.7                     |
| <b>P35908</b>     | Keratin_ type II cytoskeletal 2 epidermal         | 8889.117                    |
| <b>P05782</b>     | Keratin_ type I cytoskeletal 47 kDa               | 3935.511                    |
| <b>P31025</b>     | Von Ebner's gland protein precursor (VEG protein) | 2866.323                    |
| <b>P00695</b>     | Lysozyme C precursor                              | 2183.692                    |
| <b>P13647</b>     | Keratin_ type II cytoskeletal 5                   | 1688.301                    |
| <b>P81605</b>     | Dermcidin precursor (Preproteolysin)              | 884.0416                    |
| <b>P02533</b>     | Keratin_ type I cytoskeletal 14                   | 495.3467                    |
| <b>P48669</b>     | Keratin_ type II cytoskeletal 6F                  | 447.8473                    |
| <b>P02538</b>     | Keratin_ type II cytoskeletal 6A                  | 352.8479                    |
| <b>P05069</b>     | Type-1Aa cytolytic delta-endotoxin                | 348.306                     |

**Table S2.** Complete list of all Proteins Identified in human tear extract

| Uniprot ID | Protein                                       | Normalised Abundance | GRAVY Score | Molecular Weight (kDa) | Isoelectric Point |
|------------|-----------------------------------------------|----------------------|-------------|------------------------|-------------------|
| P31025     | Lipocalin-1                                   | 480030.9             | -0.2409     | 19249.79               | 5.3926            |
| P61626     | Lysozyme C                                    | 247753.6             | -0.1946     | 16536.85               | 9.3804            |
| P02788     | Lactotransferrin                              | 230697.4             | -0.337      | 78181.11               | 8.5036            |
| Q16378     | Proline-rich protein 4                        | 183385.8             | -1.1157     | 15096.55               | 6.4998            |
| O75556     | Mammaglobin-B                                 | 156136               | 0.0705      | 10883.73               | 5.4756            |
| P01876     | Immunoglobulin heavy constant alpha 1         | 141768.7             | -0.2103     | 42848.01               | 5.4267            |
| P25311     | Zinc-alpha-2-glycoprotein                     | 131960.1             | -0.5758     | 34258.29               | 5.7082            |
| P12273     | Prolactin-inducible protein                   | 130552.4             | 0.1753      | 16572.28               | 8.2586            |
| P01834     | Immunoglobulin kappa constant                 | 130353.5             | -0.5374     | 11764.9                | 6.1116            |
| P01036     | Cystatin-S                                    | 128826.9             | -0.3993     | 16214.18               | 4.9506            |
| P0DOY2     | Immunoglobulin lambda constant 2              | 82134.59             | -0.4443     | 11293.43               | 6.9092            |
| P06703     | Protein S100-A6                               | 81632.88             | -0.2889     | 10179.62               | 5.3234            |
| O95968     | Secretoglobin family 1D member 1              | 63599.47             | 0.5044      | 9898.02                | 9.4121            |
| P01833     | Polymeric immunoglobulin receptor             | 60920.91             | -0.3407     | 83282.6                | 5.5852            |
| Q9GZZ8     | Extracellular glycoprotein lacritin           | 54922.14             | -0.2464     | 14245.9                | 5.4378            |
| P02538     | Keratin_type II cytoskeletal 6A               | 48441.63             | -0.4385     | 60044.23               | 8.0906            |
| Q99935     | Opiorphin prepropeptide                       | 39760.39             | -0.0435     | 27216.13               | 10.4215           |
| P13645     | Keratin_type I cytoskeletal 10                | 31470.93             | -0.6236     | 58826.39               | 5.1343            |
| P04264     | Keratin_type II cytoskeletal 1                | 31027.22             | -0.6258     | 66037.94               | 8.1506            |
| P01591     | Immunoglobulin J chain                        | 30328.29             | -0.3377     | 18098.4                | 5.1155            |
| P13647     | Keratin_type II cytoskeletal 5                | 30017.76             | -0.428      | 62377.61               | 7.5835            |
| P02768     | Albumin                                       | 25553.74             | -0.3539     | 69365.96               | 5.917             |
| P35527     | Keratin_type I cytoskeletal 9                 | 19223.68             | -0.7006     | 62063.61               | 5.1362            |
| P0DOX2     | Immunoglobulin alpha-2 heavy chain            | 18243.75             | -0.2352     | 48933.62               | 6.2346            |
| P0DOX8     | Immunoglobulin lambda-1 light chain           | 17865.81             | -0.4477     | 22829.89               | 6.3438            |
| Q96DA0     | Pancreatic adenocarcinoma up-regulated factor | 15090.55             | -0.0244     | 18878.39               | 5.3814            |
| P35908     | Keratin_type II cytoskeletal 2 epidermal      | 14734.17             | -0.4709     | 65432.1                | 8.0735            |
| P61769     | Beta-2-microglobulin                          | 14376.39             | -0.3765     | 13714.4                | 6.0587            |
| P01037     | Cystatin-SN                                   | 13796.99             | -0.4404     | 16387.46               | 6.7273            |
| P06702     | Protein S100-A9                               | 12773.08             | -0.8702     | 13241.85               | 5.7131            |
| A0M8Q6     | Immunoglobulin lambda                         | 11831.43             | -0.4575     | 11253.46               | 8.5037            |

|                   | constant 7                                      |          |         |          |        |
|-------------------|-------------------------------------------------|----------|---------|----------|--------|
| <b>P05783</b>     | Keratin_ type I cytoskeletal 18                 | 10453.31 | -0.5556 | 48057.24 | 5.3369 |
| <b>P01877</b>     | Immunoglobulin heavy constant alpha 2           | 9879.015 | -0.2317 | 42333.45 | 5.4173 |
| <b>P01871</b>     | Immunoglobulin heavy constant mu                | 9835.262 | -0.2646 | 51922.94 | 5.7954 |
| <b>P05109</b>     | Protein S100-A8                                 | 8928.45  | -0.3968 | 10834.38 | 6.5107 |
| <b>P0DOX7</b>     | Immunoglobulin kappa light chain                | 8244.98  | -0.4542 | 23378.81 | 6.905  |
| <b>P63104</b>     | 14-3-3 protein zeta/delta                       | 8119.121 | -0.6208 | 27744.79 | 4.7262 |
| <b>B9A064</b>     | Immunoglobulin lambda-like polypeptide 5        | 7636.522 | -0.4037 | 23062.98 | 9.0807 |
| <b>P00738</b>     | Haptoglobin                                     | 7260.739 | -0.4212 | 45204.78 | 6.1264 |
| <b>P20061</b>     | Transcobalamin-1                                | 6766.981 | -0.1263 | 48206.15 | 4.9637 |
| <b>P10909</b>     | Clusterin                                       | 6532.979 | -0.6646 | 52494.01 | 5.8904 |
| <b>A5A3E0</b>     | POTE ankyrin domain family member F             | 5734.672 | -0.6794 | 121443.3 | 5.8249 |
| <b>P60709</b>     | Actin_ cytoplasmic 1                            | 5575.683 | -0.1997 | 41736.29 | 5.2905 |
| <b>Q15782</b>     | Chitinase-3-like protein 2                      | 5486.236 | -0.1915 | 43500.2  | 7.1112 |
| <b>P04792</b>     | Heat shock protein beta-1                       | 5027.81  | -0.5668 | 22782.23 | 5.9776 |
| <b>P22079</b>     | Lactoperoxidase                                 | 5005.09  | -0.3812 | 80286.95 | 8.8881 |
| <b>P06312</b>     | Immunoglobulin kappa variable 4-1               | 4970.707 | -0.143  | 13379.89 | 5.0863 |
| <b>A0A0B4J1V0</b> | Immunoglobulin heavy variable 3-15              | 4946.613 | -0.0958 | 12925.64 | 8.8423 |
| <b>P80303</b>     | Nucleobindin-2                                  | 4860.156 | -1.0364 | 50222.13 | 5.0257 |
| <b>P01619</b>     | Immunoglobulin kappa variable 3-20              | 4632.657 | -0.1302 | 12556.96 | 4.8532 |
| <b>Q08380</b>     | Galectin-3-binding protein                      | 4586.502 | -0.1345 | 65330.24 | 5.1283 |
| <b>P80188</b>     | Neutrophil gelatinase-associated lipocalin      | 4563.024 | -0.2677 | 22587.79 | 9.0209 |
| <b>P09211</b>     | Glutathione S-transferase P                     | 4307.996 | -0.1214 | 23355.55 | 5.4334 |
| <b>Q13421</b>     | Mesothelin                                      | 4263.175 | -0.1057 | 68984.84 | 6.0289 |
| <b>P0DMV8</b>     | Heat shock 70 kDa protein 1A                    | 3778.859 | -0.3835 | 70051.37 | 5.4809 |
| <b>O95678</b>     | Keratin_ type II cytoskeletal 75                | 3551.294 | -0.4517 | 59559.68 | 7.6046 |
| <b>P01034</b>     | Cystatin-C                                      | 3465.064 | -0.1116 | 15799.05 | 9.0009 |
| <b>P09228</b>     | Cystatin-SA                                     | 3358.834 | -0.3248 | 16444.51 | 4.8482 |
| <b>P30838</b>     | Aldehyde dehydrogenase_ dimeric NADP-preferring | 3116.277 | -0.2011 | 50394.37 | 6.1129 |
| <b>A0A0C4DH41</b> | Immunoglobulin heavy variable 4-61              | 3103.914 | -0.0297 | 13065.75 | 9.359  |
| <b>P55058</b>     | Phospholipid transfer protein                   | 2973.702 | 0.0892  | 54738.79 | 6.5325 |
| <b>P01768</b>     | Immunoglobulin heavy variable 3-30              | 2880.293 | -0.0479 | 12946.62 | 9.097  |
| <b>O76013</b>     | Keratin_ type I cuticular Ha6                   | 2807.574 | -0.3722 | 52246.52 | 4.899  |
| <b>P06396</b>     | Gelsolin                                        | 2756.513 | -0.4146 | 85696.46 | 5.8964 |
| <b>P26447</b>     | Protein S100-A4                                 | 2744.597 | -0.5644 | 11728.4  | 5.8507 |

|                   |                                               |          |         |          |        |
|-------------------|-----------------------------------------------|----------|---------|----------|--------|
| <b>P81605</b>     | Dermcidin                                     | 2735.68  | -0.2245 | 11283.73 | 6.0861 |
| <b>P01701</b>     | Immunoglobulin lambda variable 1-51           | 2721.161 | -0.1735 | 12248.55 | 6.5042 |
| <b>P02533</b>     | Keratin_ type I cytoskeletal 14               | 2468.642 | -0.5371 | 51560.91 | 5.0877 |
| <b>P06733</b>     | Alpha-enolase                                 | 2320.416 | -0.2214 | 47168.4  | 7.0118 |
| <b>P01857</b>     | Immunoglobulin heavy constant gamma 1         | 2285.508 | -0.2699 | 43911.38 | 6.5496 |
| <b>P14618</b>     | Pyruvate kinase PKM                           | 2267.849 | -0.1281 | 57936.24 | 7.955  |
| <b>P30041</b>     | Peroxiredoxin-6                               | 2133.604 | -0.2098 | 25034.67 | 5.997  |
| <b>P01624</b>     | Immunoglobulin kappa variable 3-15            | 1981.495 | -0.0809 | 12495.95 | 5.1446 |
| <b>P12035</b>     | Keratin_ type II cytoskeletal 3               | 1924.802 | -0.3889 | 64416.23 | 6.1169 |
| <b>P27348</b>     | 14-3-3 protein theta                          | 1919.922 | -0.5118 | 27763.94 | 4.6834 |
| <b>P07339</b>     | Cathepsin D                                   | 1729.75  | 0.0231  | 44551.71 | 6.1041 |
| <b>P31941</b>     | DNA dC->dU-editing enzyme AP                  | 1622.496 | -0.4256 | 23011.75 | 6.3446 |
| <b>P30740</b>     | Leukocyte elastase inhibitor                  | 1420.22  | -0.2488 | 42741.29 | 5.9037 |
| <b>P21980</b>     | Protein-glutamine gamma-glutamyltransferase 2 | 1370.92  | -0.2827 | 77327.94 | 5.1073 |
| <b>P01780</b>     | Immunoglobulin heavy variable 3-7             | 1340.955 | -0.0513 | 12942.58 | 6.2148 |
| <b>P01011</b>     | Alpha-1-antichymotrypsin                      | 1234.322 | -0.0652 | 47650.3  | 5.3278 |
| <b>P17931</b>     | Galectin-3                                    | 1206.368 | -0.3952 | 26152    | 8.5759 |
| <b>P01593</b>     | Immunoglobulin kappa variable 1D-33           | 959.3381 | -0.206  | 12848.33 | 4.5278 |
| <b>P01700</b>     | Immunoglobulin lambda variable 1-47           | 954.6687 | -0.2128 | 12283.45 | 5.5532 |
| <b>P07737</b>     | Profilin-1                                    | 925.1827 | -0.1164 | 15054.07 | 8.436  |
| <b>P30044</b>     | Peroxiredoxin-5_mitochondrial                 | 907.6692 | 0.1523  | 22086.17 | 8.9278 |
| <b>Q06830</b>     | Peroxiredoxin-1                               | 822.9324 | -0.2648 | 22110.09 | 8.2724 |
| <b>A0A0B4J1X5</b> | Immunoglobulin heavy variable 3-74            | 810.0765 | 0.0128  | 12839.47 | 8.9057 |
| <b>P00352</b>     | Aldehyde dehydrogenase 1A1                    | 758.339  | -0.1627 | 54861.2  | 6.2972 |
| <b>P05787</b>     | Keratin_ type II cytoskeletal 8               | 670.3539 | -0.5973 | 53703.63 | 5.5194 |
| <b>A0A0A0MS15</b> | Immunoglobulin heavy variable 3-49            | 535.0162 | -0.0101 | 13055.78 | 8.8419 |

**Table S3.** Biological Functions of Proteins identified in IONP@TPC.

| <b>Protein</b>                     | <b>Function</b>                                                                                                                                                                                                                                                                                                                        |
|------------------------------------|----------------------------------------------------------------------------------------------------------------------------------------------------------------------------------------------------------------------------------------------------------------------------------------------------------------------------------------|
| <b>P61626<br/>Lysozyme C</b>       | Lysozyme C is a major antimicrobial protein in tears that primarily protects the ocular surface by breaking down bacterial cell walls. In addition to its antibacterial activity, it also contributes to immune regulation and mucosal defense, helping maintain ocular surface health and protection against infections. <sup>1</sup> |
| <b>P02788<br/>Lactotransferrin</b> | Lactoferrin is an abundant iron-binding antimicrobial glycoprotein in tears that protects the eye through multiple mechanisms, including inhibition of bacterial and viral pathogens, sequestration of iron to prevent microbial growth, and modulation of inflammatory and immune responses at the ocular surface. <sup>1</sup>       |

|                                                                                           |                                                                                                                                                                                                                                                                                                                                                                                                                                                                                                                                                                                                                                                       |
|-------------------------------------------------------------------------------------------|-------------------------------------------------------------------------------------------------------------------------------------------------------------------------------------------------------------------------------------------------------------------------------------------------------------------------------------------------------------------------------------------------------------------------------------------------------------------------------------------------------------------------------------------------------------------------------------------------------------------------------------------------------|
| <p><b>O95968</b><br/><b>Secretoglobin</b><br/><b>family 1D member</b><br/><b>1</b></p>    | <p>Lipophilin A shows homology to the C1 and C2 components of prostatein (also known as estramustine-binding protein), a major secretory protein of the rat prostate.<sup>2</sup> Lipophilins are present in tears as two isoforms (A and B) and belong to the uteroglobin superfamily, a group of small secreted proteins known for their anti-inflammatory properties, steroid-binding ability, and regulation by steroid hormones.<sup>3</sup></p>                                                                                                                                                                                                 |
| <p><b>O75556</b><br/><b>Mammaglobin-B</b></p>                                             | <p>Although Mammaglobin, a uteroglobin protein, is a promising diagnostic marker for breast cancer,<sup>4</sup> function of this in tears is still not known. However, it has been reported that mammaglobin-B was also found to be decreased in evaporative dry eye disease and increased in contact lens users.<sup>5</sup></p>                                                                                                                                                                                                                                                                                                                     |
| <p><b>Q9GZZ8</b><br/><b>Extracellular</b><br/><b>glycoprotein</b><br/><b>lacritin</b></p> | <p>Lacritin is an endogenous tear glycoprotein secreted by lacrimal acinar cells that enhances basal tear secretion and exhibits mitogenic activity in lacrimal and corneal epithelial cells. Its restricted glandular expression and prosecretory signaling functions highlight its potential autocrine/paracrine role in ocular surface maintenance and therapeutic applications.<sup>6,7</sup></p>                                                                                                                                                                                                                                                 |
| <p><b>Q16378</b><br/><b>Proline-rich</b><br/><b>protein 4</b></p>                         | <p>PRR4 has been implicated in the regulation of the tear proteome during reflex tearing and is considered a potential contributor to ocular surface protection and maintenance of tear film homeostasis. Transcriptomic studies have shown that PRR4 is specifically synthesized by acinar cells of the human lacrimal gland, supporting its potential as a biomarker of lacrimal gland functional efficiency. Increased abundance of PRR4 has also been reported in reflex tears, suggesting its involvement in the clearance of ocular irritants and maintenance of ocular surface stability.<sup>8</sup></p>                                      |
| <p><b>P31025</b><br/><b>Lipocalin-1</b></p>                                               | <p>Lipocalin-1 (LCN-1), a member of the lipocalin superfamily, is known for its ability to bind a broad range of lipophilic ligands and is suggested to primarily function in lipid scavenging.<sup>9</sup> In tear fluid, LCN-1 has been reported to scavenge lipids from hydrophobic surfaces and transfer them into the aqueous tear phase, thereby contributing to the maintenance of tear film integrity and ocular surface stability.<sup>10</sup></p>                                                                                                                                                                                          |
| <p><b>P12273</b><br/><b>Prolactin-inducible</b><br/><b>protein</b></p>                    | <p>Prolactin-inducible protein (PIP), also known as gross cystic disease fluid protein-15 (GCDFP-15), is expressed in several exocrine tissues including the lacrimal, salivary, and sweat glands. PIP expression is regulated by hormones such as androgens, estrogens, and prolactin, which are important for ocular surface homeostasis and maintenance of corneal structural integrity. Although the precise biological function of PIP remains unclear, emerging evidence suggests its involvement in host defense and immune modulation, and it has also been proposed as a potential predictive biomarker for keratoconus.<sup>11,12</sup></p> |

|                                                                               |                                                                                                                                                                                                                                                                                                                                                                                                                                                                                                                                                                                                                                                                                                                                                                                                  |
|-------------------------------------------------------------------------------|--------------------------------------------------------------------------------------------------------------------------------------------------------------------------------------------------------------------------------------------------------------------------------------------------------------------------------------------------------------------------------------------------------------------------------------------------------------------------------------------------------------------------------------------------------------------------------------------------------------------------------------------------------------------------------------------------------------------------------------------------------------------------------------------------|
| <p><b>Q96DA0</b><br/><b>Pancreatic adenocarcinoma up-regulated factor</b></p> | <p>Pancreatic adenocarcinoma up-regulated factor (PAUF/ZG16B) is a secreted glycoprotein reported to exhibit pro-metastatic, pro-angiogenic, and immunomodulatory functions in several cancers; however, its specific physiological role in the eye or ocular diseases remains unclear. PAUF has been shown to enhance <math>\beta</math>-catenin expression and transcriptional activity, while PAUF knockdown reduces <math>\beta</math>-catenin signaling. Since Wnt/<math>\beta</math>-catenin signaling is critical for retinal vascular development and blood–retinal barrier integrity, PAUF may potentially influence these ocular processes, although this has not yet been experimentally validated.<sup>13</sup></p>                                                                  |
| <p><b>P04264</b><br/><b>Keratin, type II cytoskeletal 1</b></p>               | <p>Keratin 1 (KRT1) is a type II intermediate filament protein involved in structural support and stress protection in stratified epithelia, including the ocular surface. Although not a cornea-specific keratin like KRT3 and KRT12, it is associated with the keratin cytoskeletal network that maintains corneal epithelial cell shape, mechanical resilience, transparency, and barrier function. During epithelial injury, stress-associated keratins such as KRT14 and KRT17 contribute to limbal stem cell proliferation, migration, and corneal wound healing.<sup>14,15</sup></p>                                                                                                                                                                                                      |
| <p><b>P01876</b><br/><b>Immunoglobulin heavy constant alpha 1</b></p>         | <p>Immunoglobulin A1 (IgA1) is a major mucosal immunoglobulin that mediates immune exclusion by binding pathogens and toxins at mucosal surfaces, including the ocular surface, thereby preventing microbial adhesion and invasion with minimal inflammation. Through interaction with the polymeric immunoglobulin receptor (pIgR), IgA1 undergoes epithelial transcytosis to form secretory IgA, the predominant immunoglobulin in tears and conjunctival secretions. At the ocular surface, secretory IgA contributes to first-line defense, immune homeostasis, and protection against microbial colonization and conjunctival infections, while IgA dysregulation or deficiency may impair mucosal immunity and increase susceptibility to recurrent ocular infections.<sup>16,17</sup></p> |
| <p><b>P01834</b><br/><b>Immunoglobulin kappa constant</b></p>                 | <p>Immunoglobulin kappa constant (IGKC) encodes the constant region of <math>\kappa</math> light chains that are essential for antibody assembly, antigen recognition, and B-cell receptor formation. At the ocular surface, <math>\kappa</math>-containing IgG and IgA antibodies in tears and conjunctival secretions contribute to humoral immunity by neutralizing pathogens, supporting immune exclusion, and maintaining adaptive immune responses in the conjunctiva and lacrimal gland. Although IGKC has no known eye-specific effector function, it is important for the formation of functional antibodies that protect the cornea and conjunctiva from microbial invasion.<sup>18,19</sup></p>                                                                                       |

|                                                                       |                                                                                                                                                                                                                                                                                                                                                                                                                                                                                                                                                                                                                                                             |
|-----------------------------------------------------------------------|-------------------------------------------------------------------------------------------------------------------------------------------------------------------------------------------------------------------------------------------------------------------------------------------------------------------------------------------------------------------------------------------------------------------------------------------------------------------------------------------------------------------------------------------------------------------------------------------------------------------------------------------------------------|
| <p><b>P06702</b><br/><b>Protein S100-A9</b></p>                       | <p>Protein S100-A9 (S100A9/calprotectin) is a damage-associated molecular pattern (DAMP) protein implicated in ocular surface inflammation and innate immune activation. Together with S100A8, it regulates neutrophil chemotaxis and inflammatory responses in ocular disorders such as dry eye disease, meibomian gland dysfunction, pterygium, corneal neovascularization, keratitis, uveitis, retinal neuroinflammation, and glaucoma, with elevated expression consistently reported in inflammatory ocular conditions.<sup>20,21</sup></p>                                                                                                            |
| <p><b>Q99935 Opiorphin prepropeptide</b></p>                          | <p>Involved in the protection of the ocular surface, maintenance of ocular surface homeostasis, and modulation of pain signaling/pain relief mechanisms.<sup>22</sup></p>                                                                                                                                                                                                                                                                                                                                                                                                                                                                                   |
| <p><b>P35527</b><br/><b>Keratin, type I cytoskeletal 9</b></p>        | <p>Keratin 9 (P35527, KRT9) is a palmoplantar-specific type I intermediate filament; there is currently no evidence that it has a specific physiological ocular function, and it is not part of the normal corneal/ocular surface keratin repertoire that maintains eye structure or transparency.<sup>23</sup></p>                                                                                                                                                                                                                                                                                                                                         |
| <p><b>P12035</b><br/><b>Keratin, type II cytoskeletal 3</b></p>       | <p>Keratin 3 (P12035, KRT3; keratin, type II cytoskeletal 3) is a cornea-specific intermediate filament protein that, together with keratin 12 (KRT12), is essential for the structural integrity, transparency, and barrier function of the corneal epithelium; mutations cause Meesmann corneal dystrophy and epithelial fragility.<sup>24-26</sup></p>                                                                                                                                                                                                                                                                                                   |
| <p><b>P01877</b><br/><b>Immunoglobulin heavy constant alpha 2</b></p> | <p>Immunoglobulin heavy constant alpha 2 (IGHA2) encodes the constant region of the IgA2 heavy chain and contributes to ocular mucosal immunity as a component of secretory IgA in tears. Along with IgA1, IgA2 participates in first-line ocular surface defense by neutralizing pathogens and toxins, agglutinating microbes, and preventing their adhesion to the corneal and conjunctival epithelium. As part of the tear secretory IgA pool, IGH A2 plays an important role in maintaining ocular surface sterility and immune homeostasis, although no distinct ocular-specific function separate from IgA1 has been established.<sup>27,28</sup></p> |
| <p><b>P01591</b><br/><b>Immunoglobulin J chain</b></p>                | <p>Immunoglobulin J chain has a crucial but indirect ocular function. It is involved in the formation and epithelial transport of polymeric IgA and IgM, thereby enabling secretory IgA mediated immune protection on the ocular surface.<sup>29</sup></p>                                                                                                                                                                                                                                                                                                                                                                                                  |
| <p><b>P01833 Polymeric</b></p>                                        | <p>Polymeric immunoglobulin receptor (pIgR) is a key component of ocular mucosal immunity, functioning as the epithelial receptor responsible for transporting locally produced dimeric IgA and pentameric IgM across lacrimal and conjunctival epithelia into the tear film. This process generates secretory IgA (SIgA) and secretory IgM</p>                                                                                                                                                                                                                                                                                                             |

|                                                    |                                                                                                                                                                                                                                                                                                                                                                                                                                                                                                                                                                                                                                                                                                                                                                                                                            |
|----------------------------------------------------|----------------------------------------------------------------------------------------------------------------------------------------------------------------------------------------------------------------------------------------------------------------------------------------------------------------------------------------------------------------------------------------------------------------------------------------------------------------------------------------------------------------------------------------------------------------------------------------------------------------------------------------------------------------------------------------------------------------------------------------------------------------------------------------------------------------------------|
| <p><b>immunoglobulin receptor</b></p>              | <p>(SIgM), with SIgA representing the predominant immunoglobulin in tears. By enabling the secretion of SIgA/SIgM, pIgR supports non-inflammatory immune exclusion at the ocular surface through agglutination and neutralization of pathogens without excessive complement activation, thereby contributing to ocular surface protection and immune homeostasis.<sup>30,31</sup></p>                                                                                                                                                                                                                                                                                                                                                                                                                                      |
| <p><b>P25311<br/>Zinc-alpha-2-glycoprotein</b></p> | <p>Zinc-alpha-2-glycoprotein (ZAG, P25311/AZGP1) is a secreted lipid-mobilizing glycoprotein that is consistently detected in tear film and intraocular fluids; in ophthalmology, it appears to support tear film stability and ocular surface defense and is emerging as a biomarker and potential modulator in fungal keratitis and proliferative diabetic retinopathy. supporting movement of small molecules and contributing to tear film stability, likely via lipid binding and transport.<sup>32,33</sup></p>                                                                                                                                                                                                                                                                                                      |
| <p><b>P04792<br/>Heat shock protein beta-1</b></p> | <p>Heat shock protein beta-1 (P04792; HSPB1/HSP27) is a small heat-shock chaperone widely expressed in ocular tissues where it protects cells, especially retinal ganglion cells and corneal epithelium from stress-induced damage, but in some contexts, it may also contribute to retinal degeneration. HSPB1 exerts powerful neuroprotective effects in retinal ganglion cells (RGCs) via several mechanisms: molecular chaperone activity, stabilization of cytoskeletal elements (e.g., actin), and regulation of apoptosis by interacting with key apoptotic proteins. It can inhibit apoptosis by sequestering cytochrome c, modulating caspase activation, and interacting with components of the apoptotic machinery, thereby increasing survival of stressed RGCs in retinal disease models.<sup>34,35</sup></p> |
| <p><b>P05109<br/>Protein S100-A8</b></p>           | <p>In ophthalmology, protein S100-A8 is a key pro-inflammatory mediator in ocular surface disease and uveitis, involved in neutrophil/monocyte recruitment, corneal neovascularization, and intraocular inflammatory relapses. central regulators of neutrophil chemotaxis and inflammation in dry eye, meibomian gland dysfunction (MGD), pterygium, and corneal neovascularization.<sup>36</sup></p>                                                                                                                                                                                                                                                                                                                                                                                                                     |
| <p><b>Q13421<br/>Mesothelin</b></p>                | <p>Mesothelin is expressed in the normal human corneal epithelium and endothelium, where it is thought to contribute to cell-cell adhesion and ocular surface barrier integrity, but no eye-specific pathology linked directly to it has been defined yet.<sup>37</sup></p>                                                                                                                                                                                                                                                                                                                                                                                                                                                                                                                                                |
| <p><b>O95678<br/>Keratin, type II</b></p>          | <p>A recent proteomic investigation of human lens epithelium exposed to warming conditions identified the presence of K2C75_HUMAN (O95678; keratin, type II cytoskeletal 75), however, no specific functional role was attributed. It is primarily recognized as a hair and nail associated and currently has no defined physiological function in ocular tissues. Existing evidence indicates that its detection in eye-related</p>                                                                                                                                                                                                                                                                                                                                                                                       |

|                                                        |                                                                                                                                                                                                                                                                                |
|--------------------------------------------------------|--------------------------------------------------------------------------------------------------------------------------------------------------------------------------------------------------------------------------------------------------------------------------------|
| <b>cytoskeletal 75</b>                                 | tissues, such as lens epithelium proteomic datasets, is incidental or occurs at low levels, with no established involvement in normal corneal physiology or ocular disease pathogenesis to date. <sup>38</sup>                                                                 |
| <b>P01871<br/>Immunoglobulin<br/>heavy constant mu</b> | In ophthalmology, secreted IgM is present in vitreous and aqueous humor and contributes to retinal homeostasis and anti-inflammatory control during aging, while systemic IgM deficiency increases susceptibility to ocular infections and retinal degeneration. <sup>39</sup> |

**Table S4.** Functional category of proteins identified in tear extract based on Gene Ontology analysis.

| <b>GO_term</b> | <b>Description</b> | <b>Count_in_network</b> | <b>Strength</b> | <b>Signal</b> | <b>FDR</b> |
|----------------|--------------------|-------------------------|-----------------|---------------|------------|
| GO:0001895     | Retina homeostasis | 18 of 78                | 1.81            | 5.36          | 1.66e-22   |
| GO:0001894     | Tissue homeostasis | 22 of 238               | 1.41            | 3.73          | 9.28e-21   |

|            |                                                               |            |      |      |          |
|------------|---------------------------------------------------------------|------------|------|------|----------|
| GO:0045104 | Intermediate filament cytoskeleton organization               | 11 of 88   | 1.54 | 2.52 | 1.46e-10 |
| GO:0045109 | Intermediate filament organization                            | 10 of 69   | 1.6  | 2.5  | 4.28e-10 |
| GO:0001580 | Detection of chemical stimulus involved in sensory perception | 7 of 37    | 1.72 | 1.93 | 2.37e-07 |
| GO:0050909 | Sensory perception of taste                                   | 8 of 69    | 1.51 | 1.79 | 2.82e-07 |
| GO:1990748 | Cellular detoxification                                       | 9 of 106   | 1.37 | 1.69 | 2.82e-07 |
| GO:0042742 | Defense response to bacterium                                 | 14 of 306  | 1.1  | 1.62 | 1.17e-08 |
| GO:0006959 | Humoral immune response                                       | 12 of 268  | 1.09 | 1.42 | 2.82e-07 |
| GO:0031424 | Keratinization                                                | 7 of 83    | 1.37 | 1.31 | 1.59e-05 |
| GO:0052548 | Regulation of endopeptidase activity                          | 14 of 414  | 0.97 | 1.28 | 2.82e-07 |
| GO:0042592 | Homeostatic process                                           | 28 of 1406 | 0.74 | 1.2  | 6.61e-11 |
| GO:0030216 | Keratinocyte differentiation                                  | 8 of 138   | 1.21 | 1.18 | 2.42e-05 |
| GO:2000116 | Regulation of cysteine-type endopeptidase activity            | 10 of 236  | 1.07 | 1.16 | 9.52e-06 |
| GO:0019730 | Antimicrobial humoral response                                | 8 of 149   | 1.17 | 1.12 | 3.90e-05 |
| GO:0030162 | Regulation of proteolysis                                     | 17 of 739  | 0.8  | 1.04 | 6.28e-07 |
| GO:0098542 | Defense response to other organism                            | 20 of 989  | 0.75 | 1.01 | 2.44e-07 |
| GO:0051346 | Negative regulation of hydrolase activity                     | 11 of 354  | 0.94 | 0.98 | 3.11e-05 |
| GO:2000117 | Negative regulation of cysteine-type endopeptidase activity   | 6 of 88    | 1.28 | 0.97 | 0.00031  |
| GO:0006952 | Defense response                                              | 24 of 1394 | 0.68 | 0.95 | 8.85e-08 |
| GO:0051707 | Response to other organism                                    | 23 of 1328 | 0.68 | 0.93 | 2.05e-07 |
| GO:0009617 | Response to bacterium                                         | 15 of 663  | 0.8  | 0.93 | 7.89e-06 |
| GO:0008544 | Epidermis development                                         | 10 of 320  | 0.94 | 0.9  | 0.00010  |
| GO:0044419 | Biological process involved in interspecies interaction       | 24 of 1490 | 0.65 | 0.89 | 2.44e-07 |
| GO:0043588 | Skin development                                              | 9 of 266   | 0.97 | 0.88 | 0.00020  |
| GO:0097435 | Supramolecular fiber organization                             | 13 of 570  | 0.8  | 0.84 | 5.44e-05 |
| GO:0061844 | Antimicrobial humoral immune response                         | 6 of 113   | 1.17 | 0.81 | 0.0011   |

|            |                                                     |            |      |      |          |
|------------|-----------------------------------------------------|------------|------|------|----------|
| GO:0051238 | Sequestering of metal ion                           | 3 of 11    | 1.88 | 0.77 | 0.0038   |
| GO:0051336 | Regulation of hydrolase activity                    | 17 of 1011 | 0.67 | 0.75 | 3.90e-05 |
| GO:0018149 | Peptide cross-linking                               | 4 of 37    | 1.48 | 0.74 | 0.0035   |
| GO:0045087 | Innate immune response                              | 14 of 754  | 0.71 | 0.72 | 0.00017  |
| GO:0001906 | Cell killing                                        | 6 of 129   | 1.11 | 0.72 | 0.0023   |
| GO:0043086 | Negative regulation of catalytic activity           | 14 of 771  | 0.7  | 0.71 | 0.00020  |
| GO:0006955 | Immune response                                     | 19 of 1321 | 0.6  | 0.68 | 6.21e-05 |
| GO:0030855 | Epithelial cell differentiation                     | 12 of 617  | 0.73 | 0.67 | 0.00061  |
| GO:0051651 | Maintenance of location in cell                     | 5 of 97    | 1.16 | 0.61 | 0.0075   |
| GO:0009605 | Response to external stimulus                       | 26 of 2355 | 0.49 | 0.6  | 3.60e-05 |
| GO:0042981 | Regulation of apoptotic process                     | 19 of 1462 | 0.56 | 0.6  | 0.00023  |
| GO:0044092 | Negative regulation of molecular function           | 16 of 1143 | 0.59 | 0.58 | 0.00071  |
| GO:0070488 | Neutrophil aggregation                              | 2 of 2     | 2.44 | 0.58 | 0.0159   |
| GO:0065008 | Regulation of biological quality                    | 34 of 3654 | 0.41 | 0.57 | 1.04e-05 |
| GO:0010941 | Regulation of cell death                            | 20 of 1651 | 0.53 | 0.57 | 0.00030  |
| GO:0051248 | Negative regulation of protein metabolic process    | 15 of 1038 | 0.6  | 0.57 | 0.0010   |
| GO:2001242 | Regulation of intrinsic apoptotic signaling pathway | 6 of 169   | 0.99 | 0.56 | 0.0088   |
| GO:0060429 | Epithelium development                              | 15 of 1069 | 0.59 | 0.55 | 0.0014   |
| GO:0002376 | Immune system process                               | 23 of 2121 | 0.48 | 0.54 | 0.00026  |
| GO:0006956 | Complement activation                               | 4 of 60    | 1.27 | 0.53 | 0.0170   |
| GO:0050832 | Defense response to fungus                          | 4 of 62    | 1.25 | 0.52 | 0.0185   |
| GO:0050790 | Regulation of catalytic activity                    | 24 of 2370 | 0.45 | 0.51 | 0.00043  |
| GO:0006950 | Response to stress                                  | 30 of 3358 | 0.39 | 0.5  | 0.00019  |
| GO:0043066 | Negative regulation of apoptotic process            | 13 of 891  | 0.61 | 0.5  | 0.0041   |
| GO:0019731 | Antibacterial humoral response                      | 4 of 64    | 1.24 | 0.5  | 0.0205   |
| GO:0042744 | Hydrogen peroxide catabolic process                 | 3 of 25    | 1.52 | 0.5  | 0.0258   |
| GO:0042026 | Protein refolding                                   | 3 of 25    | 1.52 | 0.5  | 0.0258   |
| GO:2001233 | Regulation of apoptotic signaling pathway           | 8 of 365   | 0.78 | 0.48 | 0.0124   |

|            |                                                    |            |      |      |          |
|------------|----------------------------------------------------|------------|------|------|----------|
| GO:0032119 | Sequestering of zinc ion                           | 2 of 4     | 2.14 | 0.48 | 0.0337   |
| GO:0006979 | Response to oxidative stress                       | 8 of 368   | 0.78 | 0.47 | 0.0130   |
| GO:0050830 | Defense response to Gram-positive bacterium        | 5 of 130   | 1.03 | 0.46 | 0.0239   |
| GO:0031640 | Killing of cells of another organism               | 4 of 71    | 1.19 | 0.46 | 0.0283   |
| GO:0055076 | Transition metal ion homeostasis                   | 5 of 137   | 1.01 | 0.44 | 0.0289   |
| GO:0070606 | Sensory perception of chemical stimulus            | 9 of 503   | 0.7  | 0.43 | 0.0177   |
| GO:0050896 | Response to stimulus                               | 50 of 7835 | 0.25 | 0.42 | 6.80e-05 |
| GO:0032501 | Multicellular organismal process                   | 44 of 6490 | 0.27 | 0.42 | 0.00019  |
| GO:0065009 | Regulation of molecular function                   | 26 of 3085 | 0.37 | 0.4  | 0.0035   |
| GO:2001234 | Negative regulation of apoptotic signaling pathway | 6 of 230   | 0.86 | 0.4  | 0.0359   |
| GO:0051246 | Regulation of protein metabolic process            | 23 of 2622 | 0.39 | 0.38 | 0.0069   |
| GO:0007010 | Cytoskeleton organization                          | 14 of 1229 | 0.5  | 0.36 | 0.0223   |
| GO:0070887 | Cellular response to chemical stimulus             | 22 of 2609 | 0.37 | 0.33 | 0.0177   |
| GO:0042221 | Response to chemical                               | 29 of 4010 | 0.3  | 0.32 | 0.0146   |

**Table S5.** Functional category of proteins identified in IONP@TPC based on Gene Ontology analysis.

| GO-term    | Description                                                                   | Count in network | Strength | Signal | FDR      |
|------------|-------------------------------------------------------------------------------|------------------|----------|--------|----------|
| GO:0001895 | Retina homeostasis                                                            | 12 of 78         | 2.16     | 6.62   | 1.70E-19 |
| GO:0001894 | Tissue homeostasis                                                            | 13 of 238        | 1.71     | 4.22   | 2.46E-16 |
| GO:0042592 | Homeostatic process                                                           | 15 of 1406       | 1        | 1.36   | 7.69E-10 |
| GO:0050909 | Sensory perception of taste                                                   | 4 of 69          | 1.74     | 1.13   | 0.0018   |
| GO:0045109 | Intermediate filament organization                                            | 4 of 69          | 1.74     | 1.13   | 0.0018   |
| GO:0042742 | Defense response to bacterium                                                 | 6 of 306         | 1.26     | 0.96   | 0.0015   |
| GO:0070488 | Neutrophil aggregation                                                        | 2 of 2           | 2.97     | 0.96   | 0.0078   |
| GO:0001580 | Detection of chemical stimulus involved in sensory perception of bitter taste | 3 of 37          | 1.88     | 0.85   | 0.0105   |
| GO:0032119 | Sequestering of zinc ion                                                      | 2 of 4           | 2.67     | 0.84   | 0.0142   |
| GO:0006959 | Humoral immune response                                                       | 5 of 268         | 1.24     | 0.73   | 0.0093   |
| GO:0018119 | Peptidyl-cysteine S-nitrosylation                                             | 2 of 6           | 2.5      | 0.73   | 0.0236   |
| GO:0019730 | Antimicrobial humoral response                                                | 4 of 149         | 1.4      | 0.71   | 0.0155   |
| GO:0035425 | Autocrine signaling                                                           | 2 of 7           | 2.43     | 0.7    | 0.0276   |
| GO:0050832 | Defense response to fungus                                                    | 3 of 62          | 1.66     | 0.66   | 0.0276   |
| GO:0002544 | Chronic inflammatory response                                                 | 2 of 13          | 2.16     | 0.59   | 0.0490   |
| GO:0031424 | Keratinization                                                                | 3 of 83          | 1.53     | 0.56   | 0.0451   |
| GO:0052548 | Regulation of endopeptidase activity                                          | 5 of 414         | 1.05     | 0.51   | 0.0351   |
| GO:0098542 | Defense response to other organism                                            | 7 of 989         | 0.82     | 0.46   | 0.0308   |

|            |                                  |            |      |      |        |
|------------|----------------------------------|------------|------|------|--------|
| GO:0051707 | Response to other organism       | 8 of 1328  | 0.75 | 0.44 | 0.0276 |
| GO:0032501 | Multicellular organismal process | 18 of 6490 | 0.42 | 0.37 | 0.0018 |

## References

- 1 H. G. Hanstock, J. P. Edwards and N. P. Walsh, *Front. Immunol.*, DOI:10.3389/fimmu.2019.01178.
- 2 C. Zhao, T. Nguyen, T. Yusifov, B. J. Glasgow and R. I. Lehrer, *Biochemical and Biophysical Research Communications*, 1999, **256**, 147–155.
- 3 Tear proteomics in evaporative dry eye disease | Eye, <https://www.nature.com/articles/eye20107>, (accessed May 14, 2026).
- 4 D. Carter, J. F. Douglass, C. D. Cornellison, M. W. Retter, J. C. Johnson, A. A. Bennington, T. P. Fleming, S. G. Reed, R. L. Houghton, D. L. Diamond and T. S. Vedvick, *Biochemistry*, 2002, **41**, 6714–6722.
- 5 N. Perumal, S. Funke, D. Wolters, N. Pfeiffer and F. H. Grus, *PROTEOMICS*, 2015, **15**, 3370–3381.
- 6 Reduced Levels of Tear Lacritin Are Associated With Corneal Neuropathy in Patients With the Ocular Component of Sjögren’s Syndrome | IOVS | ARVO Journals, <https://iovs.arvojournals.org/article.aspx?articleid=2566337>, (accessed May 14, 2026).
- 7 S. Sanghi, R. Kumar, A. Lumsden, D. Dickinson, V. Klepeis, V. Trinkaus-Randall, H. F. Frierson and G. W. Laurie, *Journal of Molecular Biology*, 2001, **310**, 127–139.
- 8 N. Perumal, S. Funke, D. Wolters, N. Pfeiffer and F. H. Grus, *PROTEOMICS*, 2015, **15**, 3370–3381.
- 9 M. Lechner, P. Wojnar and B. Redl, *Biochem J*, 2001, **356**, 129–135.
- 10 B. Nagyová and J. M. Tiffany, *Current Eye Research*, 1999, **19**, 4–11.
- 11 R. Sharif, S. Bak-Nielsen, H. Sejersen, K. Ding, J. Hjortdal and D. Karamichos, *Experimental Eye Research*, 2019, **179**, 55–63.
- 12 C.-L. Chng, L. L. Seah, M. Yang, S. Y. Shen, S. K. Koh, Y. Gao, L. Deng, L. Tong, R. W. Beuerman and L. Zhou, *Sci Rep*, 2018, **8**, 16936.
- 13 Pancreatic adenocarcinoma up-regulated factor (PAUF), a novel up-regulated secretory protein in pancreatic ductal adenocarcinoma - Kim - 2009 - Cancer Science - Wiley Online Library, <https://onlinelibrary.wiley.com/doi/full/10.1111/j.1349-7006.2009.01106.x>, (accessed May 14, 2026).
- 14 M. Wang, R. Chen, Y. Wang, Y. Li, Q. Zhou, R. Cao, Y. Li, H. Ge, X. Wang and L. Yang, *Invest. Ophthalmol. Vis. Sci.*, 2025, **66**, 55.
- 15 T. Kivelä and M. Uusitalo, *Progress in Retinal and Eye Research*, 1998, **17**, 385–428.
- 16 M. L. Kordasz, C. Manicam, A. Steege, E. Goloborodko, C. Amato, P. Laspas, C. Brochhausen, N. Pfeiffer and A. Gericke, *Invest. Ophthalmol. Vis. Sci.*, 2014, **55**, 8295–8301.
- 17 Multiorgan transcriptomics in mice identifies immunoglobulin heavy constant mu (Ighm) as a tissue-level aging biomarker | PNAS, <https://www.pnas.org/doi/10.1073/pnas.2423142122>, (accessed May 14, 2026).
- 18 UniProt, <https://www.uniprot.org/uniprotkb/P01834/entry>, (accessed May 14, 2026).
- 19 IGKC immunoglobulin kappa constant [Homo sapiens (human)] - Gene - NCBI, <https://www.ncbi.nlm.nih.gov/gene/3514>, (accessed May 14, 2026).
- 20 L. Tong, W. Lan, R. R. Lim and S. S. Chaurasia, *The Ocular Surface*, 2014, **12**, 23–31.

- 21 Frontiers | Pro-inflammatory S100A9 contributes to retinal ganglion cell degeneration in glaucoma, <https://www.frontiersin.org/journals/immunology/articles/10.3389/fimmu.2025.1667097/full>, (accessed May 14, 2026).
- 22 G. Giannaccare, C. Ghelardini, A. Mancini, V. Scorcina and L. Di Cesare Mannelli, *Journal of Clinical Medicine*, 2022, **11**, 108.
- 23 D. J. Fu, C. Thomson, D. P. Lunny, P. J. Dopping-Hepenstal, J. A. McGrath, F. J. D. Smith, W. H. Irwin McLean and D. M. Leslie Pedrioli, *Journal of Investigative Dermatology*, 2014, **134**, 754–763.
- 24 W. W. Kao, C. Y. Liu, R. L. Converse, A. Shiraishi, C. W. Kao, M. Ishizaki, T. Doetschman and J. Duffy, *Invest Ophthalmol Vis Sci*, 1996, **37**, 2572–2584.
- 25 K. Gee, B. R. Lin, J. Gee, C. Tangmonkongvoragul and A. J. Aldave, *Invest. Ophthalmol. Vis. Sci.*, 2015, **56**, 2530–2530.
- 26 KRT3 gene, <https://medlineplus.gov/genetics/gene/krt3/>, (accessed May 14, 2026).
- 27 What Is Immunoglobulin A (IgA) & What Does It Do?, <https://my.clevelandclinic.org/health/body/immunoglobulin-a>, (accessed May 14, 2026).
- 28 In *Mucosal Immunology*, Academic Press, 2005, pp. 1477–1496.
- 29 E. Knop, N. Knop and P. Claus, *Invest. Ophthalmol. Vis. Sci.*, 2008, **49**, 2322–2329.
- 30 F.-E. Johansen and C. S. Kaetzel, *Mucosal Immunol*, 2011, **4**, 598–602.
- 31 Polymeric immunoglobulin receptor traffics through two distinct apically targeted pathways in primary lacrimal gland acinar cells | *Journal of Cell Science* | The Company of Biologists, <https://journals.biologists.com/jcs/article/126/12/2704/33013/Polymeric-immunoglobulin-receptor-traffics-through>, (accessed May 14, 2026).
- 32 P. Umapathy, K. Arumugam, R. B. Babu, R. R. Nadig, R. Raman, G. S. Rao, M. P. Bhende, V. Natarajan, R. KM and B. Subramaniam Rajesh, *Int Ophthalmol*, 2025, **45**, 120.
- 33 *Biocell*, 2023, **47**, 1473–1482.
- 34 V. Rajeswaren, J. O. Wong, D. Yabroudi, R. B. Nahomi, J. Rankenberg, M.-H. Nam and R. H. Nagaraj, *Front. Mol. Biosci.*, DOI:10.3389/fmolb.2022.860375.
- 35 A. M. O'Reilly, R. W. Currie and D. B. Clarke, *Mol Neurobiol*, 2010, **42**, 124–132.
- 36 L. Tong, W. Lan, R. R. Lim and S. S. Chaurasia, *Ocul Surf*, 2014, **12**, 23–31.
- 37 Mesothelial proteins are expressed in the human..., <https://www.ovid.com/journals/exeyr/fulltext/10.1016/j.exer.2010.08.002~mesothelial-proteins-are-expressed-in-the-human-cornea>, (accessed May 14, 2026).
- 38 H. Otake, T. Yamamoto, N. Yamamoto, Y. Nakazawa, Y. Miyata, A. Taga, H. Sasaki and N. Nagai, *Medicina*, 2025, **61**, 286.
- 39 S. E. Webster, S. M. Les, N. Deleon, D. M. Heck, N. L. Tsuj, M. J. Clemente, P. Jones and N. E. Holodick, *Immun Ageing*, 2025, **22**, 9.
